# Supplementary material for: Microwave-assisted depolymerization of lignin with synergic alkali catalysts and a transition metal catalyst in the aqueous system
Source: Royal Society of Chemistry journal article supplement (doi:10.1039/d2re00091a), 2022-01-01
Supplement: d2re00091a1.pdf [file d2re00091a1.pdf]

## ***Supporting Information***

### **Microwave-assisted depolymerization of lignin with synergic alkali catalysts and transition metal catalyst in the aqueous system**

Heyu Li<sup>a,b,1</sup>, Yingfang Huang<sup>a,b,2</sup>, Xiuhua Lin<sup>a,b,3</sup>, Yifan Liu<sup>a,b,4</sup>, Yuancai Lv<sup>a,b,5</sup>,  
Minghua Liu<sup>a,b,\*</sup>, Yuming Zhang<sup>c\*</sup>

<sup>a</sup> Fujian Provincial Engineering Research Center of Rural Waste Recycling  
Technology, College of Environment and Safety Engineering, Fuzhou University,  
Fuzhou 350116, Fujian, China

<sup>b</sup> Fujian Provincial Technology Exploitation Base of Biomass Resources, Fuzhou  
University, Fuzhou 350116, China

<sup>c</sup> State Key Laboratory of Heavy Oil Processing, China University of Petroleum-  
Beijing, Beijing 102249, China

\* Corresponding author's E-mails: mhliu2000@fzu.edu.cn; Address: College of  
Environment & Safety Engineering, Fuzhou University, No.2 Xueyuan Road,  
Shangjie Town, Minhou County, Fuzhou, Fujian, 350116, China

\*\* Corresponding author's E-mails: ymzhang@cup.edu.cn; Address: China University  
of Petroleum-Beijing, No.18 Fuxue Road, Changping District, Beijing 102249, China

Number of pages: 7

Number of figures: 4

Number of tables: 1

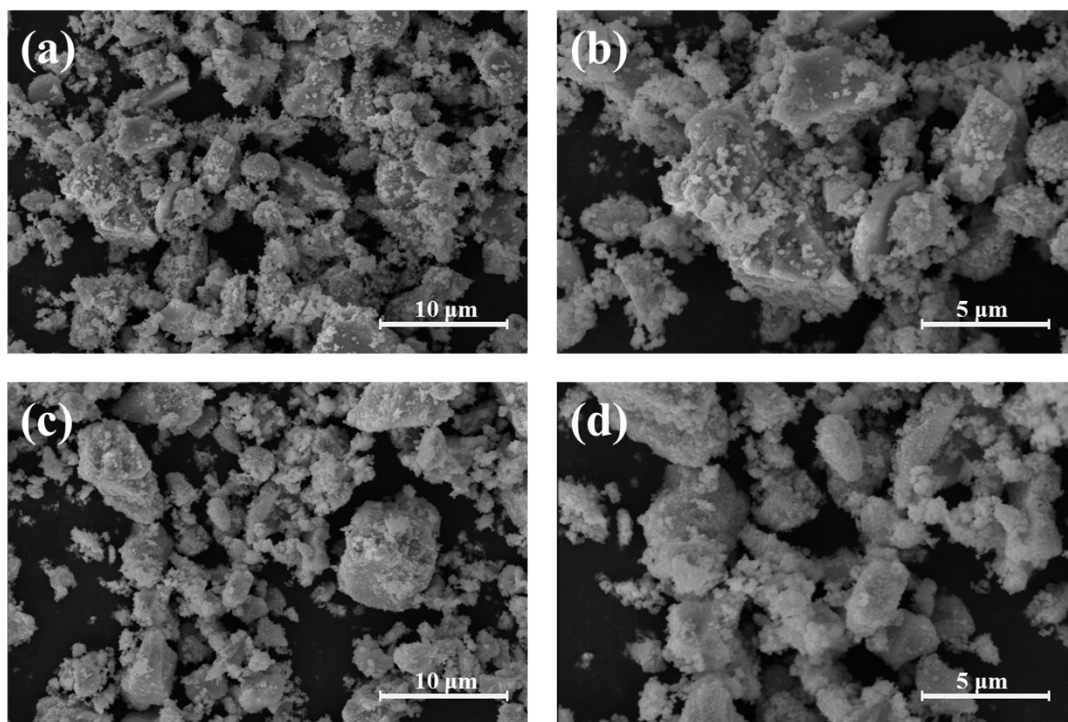

Fig.S1 The SEM image of catalysts: (a) (b)  $\text{ZrO}_2$ , (c) (d)  $\text{Ni/ZrO}_2$

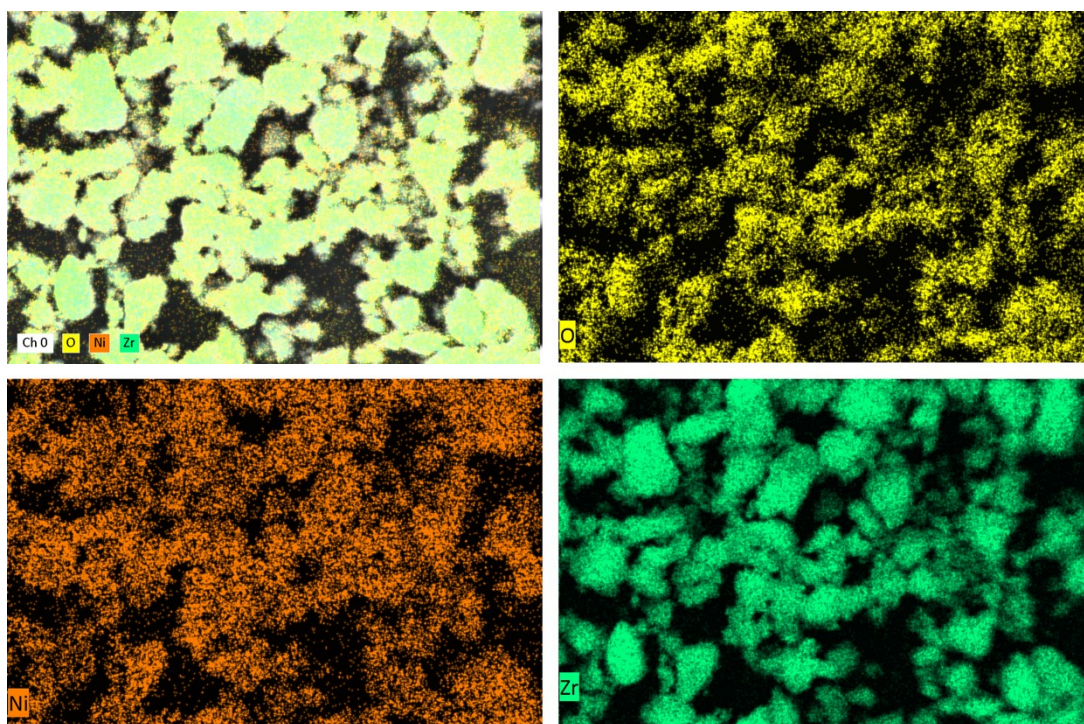

Fig.S2 The mapping of Ni/ZrO<sub>2</sub>

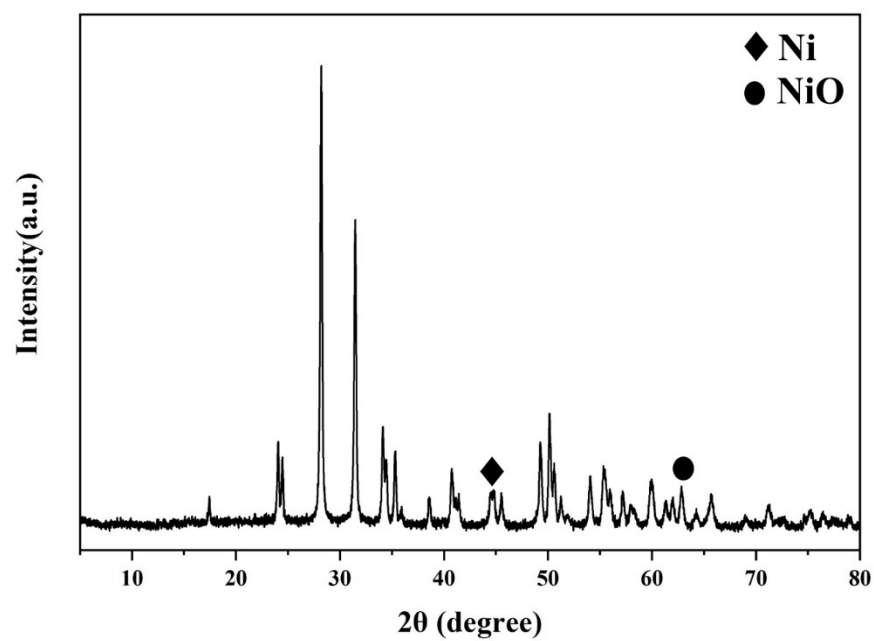

Fig.S3 The XRD pattern of Ni/ZrO<sub>2</sub>

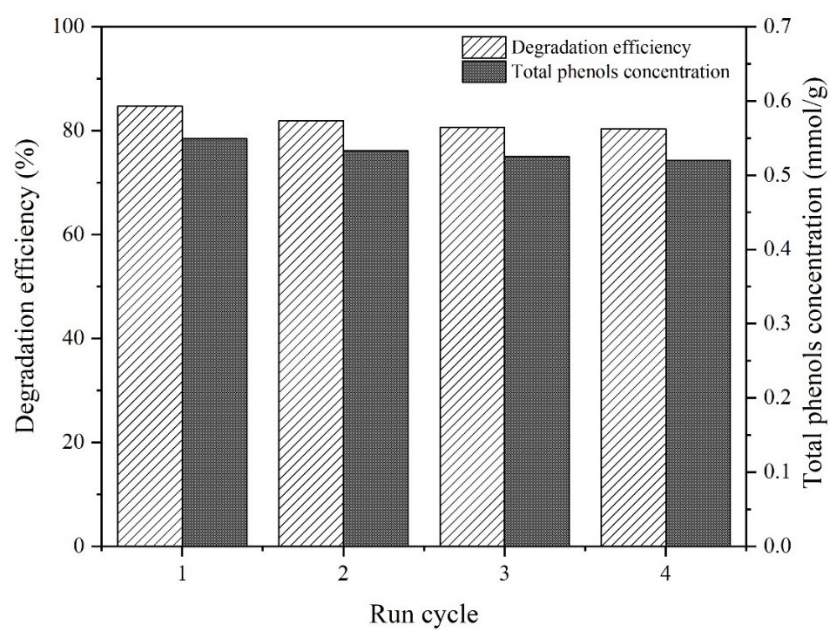

Fig. S4. Recyclability test of the Ni /ZrO<sub>2</sub> catalyst for depolymerization of lignin.

Table S1. The lignin depolymerization reaction conditions of current investigations

| Entry | Catalysts                                    | Temperature(°C) | Initial pressure(Mpa) | Reference  |
|-------|----------------------------------------------|-----------------|-----------------------|------------|
| 1     | Ni/Al <sub>2</sub> O <sub>3</sub>            | 300             | 5                     | 1          |
| 2     | Ni/HZSM-5                                    | 200             | 5                     | 2          |
| 3     | Ni-Fe/CNT                                    | 300             | 3                     | 3          |
| 4     | Ni/TiN                                       | 250             | 1                     | 4          |
| 5     | Ni <sub>1</sub> Fe <sub>1</sub> /AC          | 225             | 2                     | 5          |
| 6     | Ni <sub>10</sub> Cu <sub>5</sub> /C          | 270             | 1                     | 6          |
| 7     | Ni/ZrO <sub>2</sub> +NaOH+NaAlO <sub>2</sub> | 180             | Atmospheric pressure  | This study |

## References:

1. Zhang X.; Tang W.; Zhang Q, et al. Hydrodeoxygenation of lignin-derived phenolic compounds to hydrocarbon fuel over supported Ni-based catalysts. *Appl Energy* **2018**, 227, 73-79.
2. Zhao C.; Yu Y.; Jentys A, et al. Understanding the impact of aluminum oxide binder on Ni/HZSM-5 for phenol hydrodeoxygenation. *Appl Catal B Environ* **2013**, 132, 82-92.
3. Fang H.; Zheng J.; Luo X, et al. Product tunable behavior of carbon nanotubes-supported Ni–Fe catalysts for guaiacol hydrodeoxygenation. *Appl Catal Gen* **2017**, 529, 20-31
4. Bie L.; Liu F.; Zong Z.; Liu, G.; Guo, J.; Li, Z.; Ma, Z.; Yan, W.; Wei, X., Selective hydrogenolysis of C O bonds in benzyloxybenzene and dealkaline lignin to valuable aromatics over Ni/TiN. *Fuel Processing Technology* **2020**, 209, 106523.
5. Zhang Y.; Li C.; Xu G, et al. Depolymerization of lignin via a non-precious Ni-Fe alloy catalyst supported on activated carbon. *Green Chemistry* **2017**, 19(8), 1895-1903.
6. Cheng C.; Li P.; Yu W, et al. Catalytic hydrogenolysis of lignin in ethanol/isopropanol over an activated carbon supported nickel-copper catalyst. *Bioresource Technology* **2020**, 319, 124238.
